# Supplementary material
Source: publisher figshare collection journal article supplement (https://acs.figshare.com/ndownloader/files/15136388)
Supplement: Supplementary file 1 [file 15136388]

## Supporting Information

### Adsorptive Spin Coating To Study Thin-Film Stability in Both Wetting and Nonwetting Regimes

*Yueyue Qi, Haimi Nguyen, Kelly Sin Ee Lim, Wenyun Wang, and Wei Chen\**

Chemistry Department, Mount Holyoke College, South Hadley, MA 01075

\*E-mail: weichen@mtholyoke.edu. Phone: 413-538-2224. Fax: 413-538-2327.

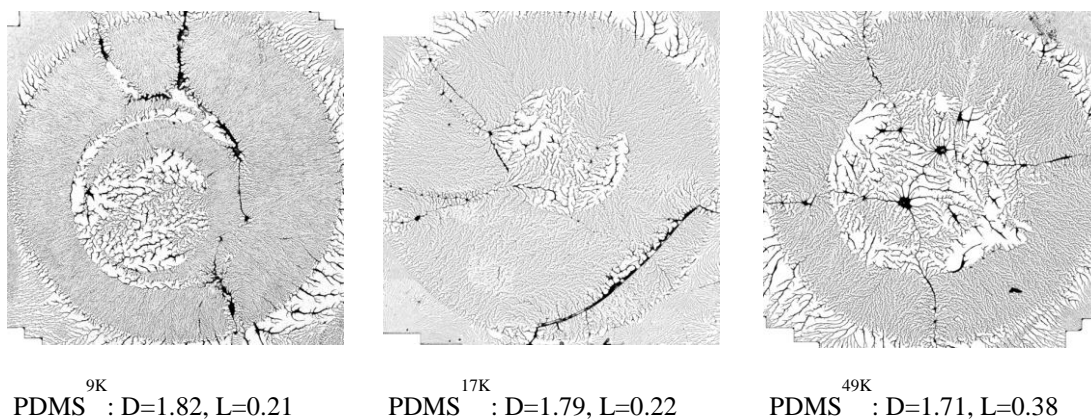

Figure S3. Binary optical images of dewetted thin films after adsorptive spin coating of a 200  $\mu\text{L}$  PVOH solution (drop diameter:  $9.2 \pm 0.1$  mm) on various PDMS substrates at 6000 rpm. Each image was constructed using Autopano Giga from sectional images captured using the 5 $\times$  objective lens. D and L values of the outer bands are also shown.
